# Supplementary material for: Lithium-ion conductivity in Li6Y(BO3)3: a thermally and electrochemically robust solid electrolyte
Source: Royal Society of Chemistry journal article supplement (doi:10.1039/c5ta09436d), 2016-01-01
Supplement: c5ta09436d1.pdf [file c5ta09436d1.pdf]

Cite this: DOI: 10.1039/xxxxxxxxxx

## Lithium-ion conductivity in $\text{Li}_6\text{Y}(\text{BO}_3)_3$ : a thermally and electrochemically robust solid electrolyte<sup>†</sup>

Beatriz Lopez-Bermudez,<sup>\*a</sup> Wolfgang G. Zeier,<sup>a</sup> Shiliang Zhou,<sup>a</sup> Anna J. Lehner,<sup>b</sup> Jerry Hu,<sup>b</sup> David O. Scanlon,<sup>c,d</sup> Benjamin J. Morgan,<sup>d\*</sup> and Brent C. Melot<sup>a\*</sup>

Received Date

Accepted Date

DOI: 10.1039/xxxxxxxxxx

www.rsc.org/journalname

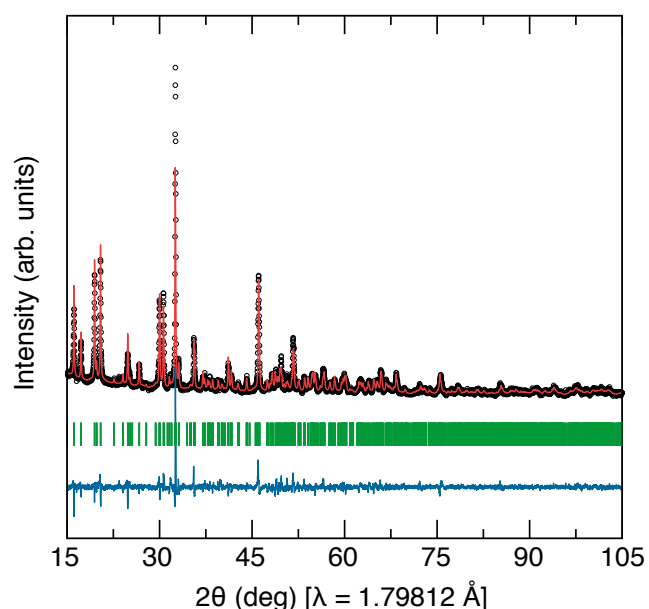

**Figure S 1** Results of the Rietveld refinement of laboratory X-ray diffraction data on  $\text{Li}_6\text{Y}(\text{BO}_3)_3$ .  $R_{\text{Bragg}}=9.5\%$ . The reflection markers (green) show no secondary reflections of any possible secondary phases.

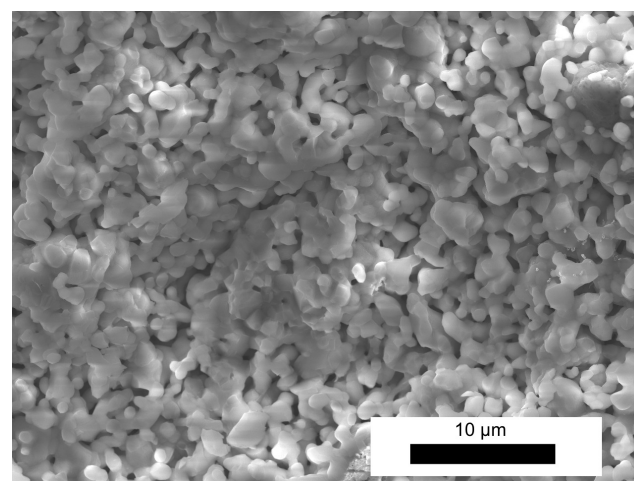

**Figure S 2** Scanning electron microscopy micrographs of a fractured surface of  $\text{Li}_6\text{Y}(\text{BO}_3)_3$  in secondary electron mode, showing a  $\sim 70\%$  dense materials with grain sizes between  $1 \mu\text{m}$  to  $5 \mu\text{m}$  and good connectivity between the grains. The random orientation of the grains corroborates a negligible degree of preferred orientation.

**Table S 1** Temperature dependent lithium ion conductivity of  $\text{Li}_6\text{Y}(\text{BO}_3)_3$ , obtained using AC impedance measurements

| T (K) | $\sigma$ ( $\text{S}\cdot\text{cm}^{-1}$ ) |
|-------|--------------------------------------------|
| 323   | $1.93\cdot 10^{-8}$                        |
| 373   | $3.23\cdot 10^{-7}$                        |
| 423   | $2.64\cdot 10^{-6}$                        |
| 473   | $1.57\cdot 10^{-5}$                        |
| 523   | $4.71\cdot 10^{-5}$                        |
| 573   | $1.74\cdot 10^{-4}$                        |
| 623   | $7.04\cdot 10^{-4}$                        |
| 673   | $2.27\cdot 10^{-3}$                        |
| 723   | $6.59\cdot 10^{-3}$                        |
| 773   | $1.75\cdot 10^{-2}$                        |

<sup>a</sup> Department of Chemistry, University of Southern California, Los Angeles, CA 90089, USA E-mail: melot@usc.edu

<sup>b</sup> Materials Research Laboratory, University of California, Santa Barbara, CA 93106, USA

<sup>c</sup> University College London, Kathleen Lonsdale Materials Chemistry, 20 Gordon Street, London WC1H 0AJ, United Kingdom

<sup>d</sup> Diamond Light Source Ltd., Diamond House, Harwell Science and Innovation Campus, Didcot, Oxfordshire OX11 0DE, United Kingdom

<sup>e</sup> Department of Chemistry, University of Bath, Claverton Down, BA2 7AY, United Kingdom

<sup>†</sup> Electronic Supplementary Information (ESI) available: [details of any supplementary information available should be included here]. See DOI: 10.1039/b000000x/

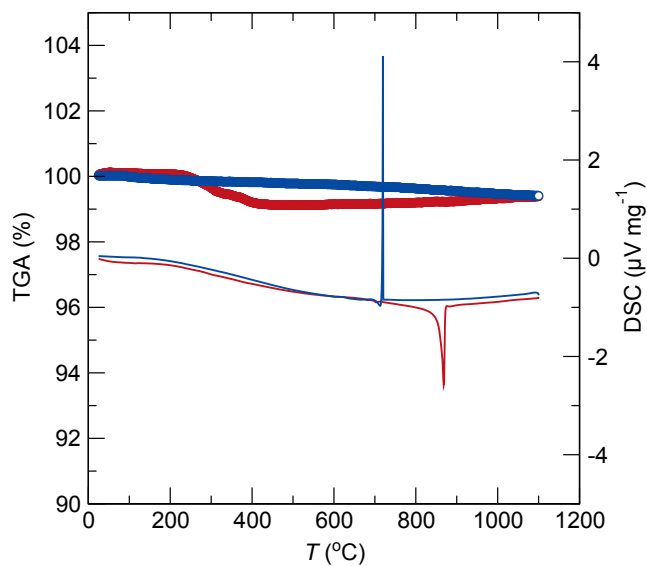

**Figure S 3** Thermal analysis of  $\text{Li}_6\text{Y}(\text{BO}_3)_3$  exhibits no changes in weight or reactions up to the melting point of  $870^\circ$ . The very minor change in weight, on the order of 1%, can be attributed to small errors associated with changes in buoyancy or potentially the evaporation of a small amount of surface moisture.

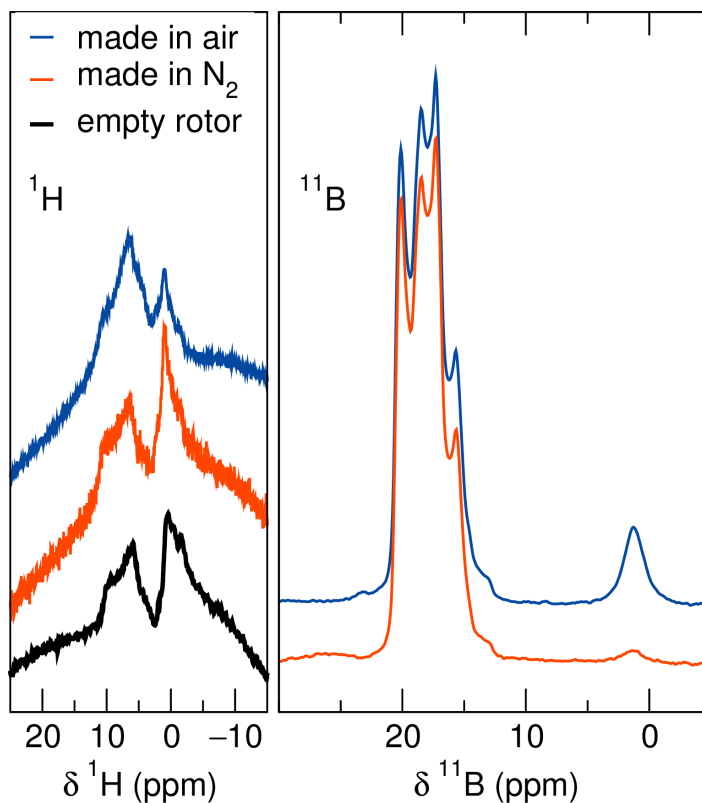

**Figure S 4**  $^1\text{H}$  and  $^{11}\text{B}$  MAS NMR spectra of  $\text{Li}_6\text{Y}(\text{BO}_3)_3$  samples prepared by heating in air or  $\text{N}_2$ .

**Table S 2** Energy of formation for vacancies at various Li positions,  $\Delta E_f$  and energies relative to the most stable vacancy position,  $\Delta E_{vac}$ .

| Li site | $\Delta E_f$ (eV) | $\Delta E_{vac}$ (eV) |
|---------|-------------------|-----------------------|
| A       | 4.094             | 0.000                 |
| B       | 4.267             | 0.174                 |
| C       | 4.401             | 0.307                 |
| D       | 4.512             | 0.418                 |
| E       | 4.715             | 0.621                 |
| F       | 4.794             | 0.701                 |
